# Supplementary material for: Closing the loop: polyimine thermosets from furfural derived bioresources
Source: Royal Society of Chemistry journal article supplement (doi:10.1039/d3lp00268c), 2024-01-01
Supplement: d3lp00268c1.pdf [file d3lp00268c1.pdf]

## Supporting Information

### Closing the Loop: Polyimine Thermosets from Furfural Derived Bioresources

Tankut Türel,<sup>a†</sup> Keita Saito,<sup>a†</sup> Ivona Glišić,<sup>a</sup> Tim Middelhoek<sup>a</sup> and Željko Tomović<sup>a\*</sup>

a. Polymer Performance Materials Group, Department of Chemical Engineering and Chemistry, Eindhoven University of Technology, 5600 MB Eindhoven, The Netherlands.

### Contents

|                                                                              |     |
|------------------------------------------------------------------------------|-----|
| 1. Synthesis, characterization and stability of OBMF .....                   | S2  |
| 2. Synthesis and structural characterization of the polyimine networks ..... | S5  |
| 3. Stability of polyimine networks in organic solvents and water .....       | S6  |
| 4. Thermal analysis of polyimine networks .....                              | S8  |
| 5. Thermomechanical analysis of polyimine networks.....                      | S10 |
| 6. Mechanical analysis .....                                                 | S11 |
| 7. Scanning electron microscopy .....                                        | S11 |
| 8. Chemical recycling of the <b>P(FIm)-TREN</b> network.....                 | S12 |

# 1. Synthesis, characterization and stability of OBMF

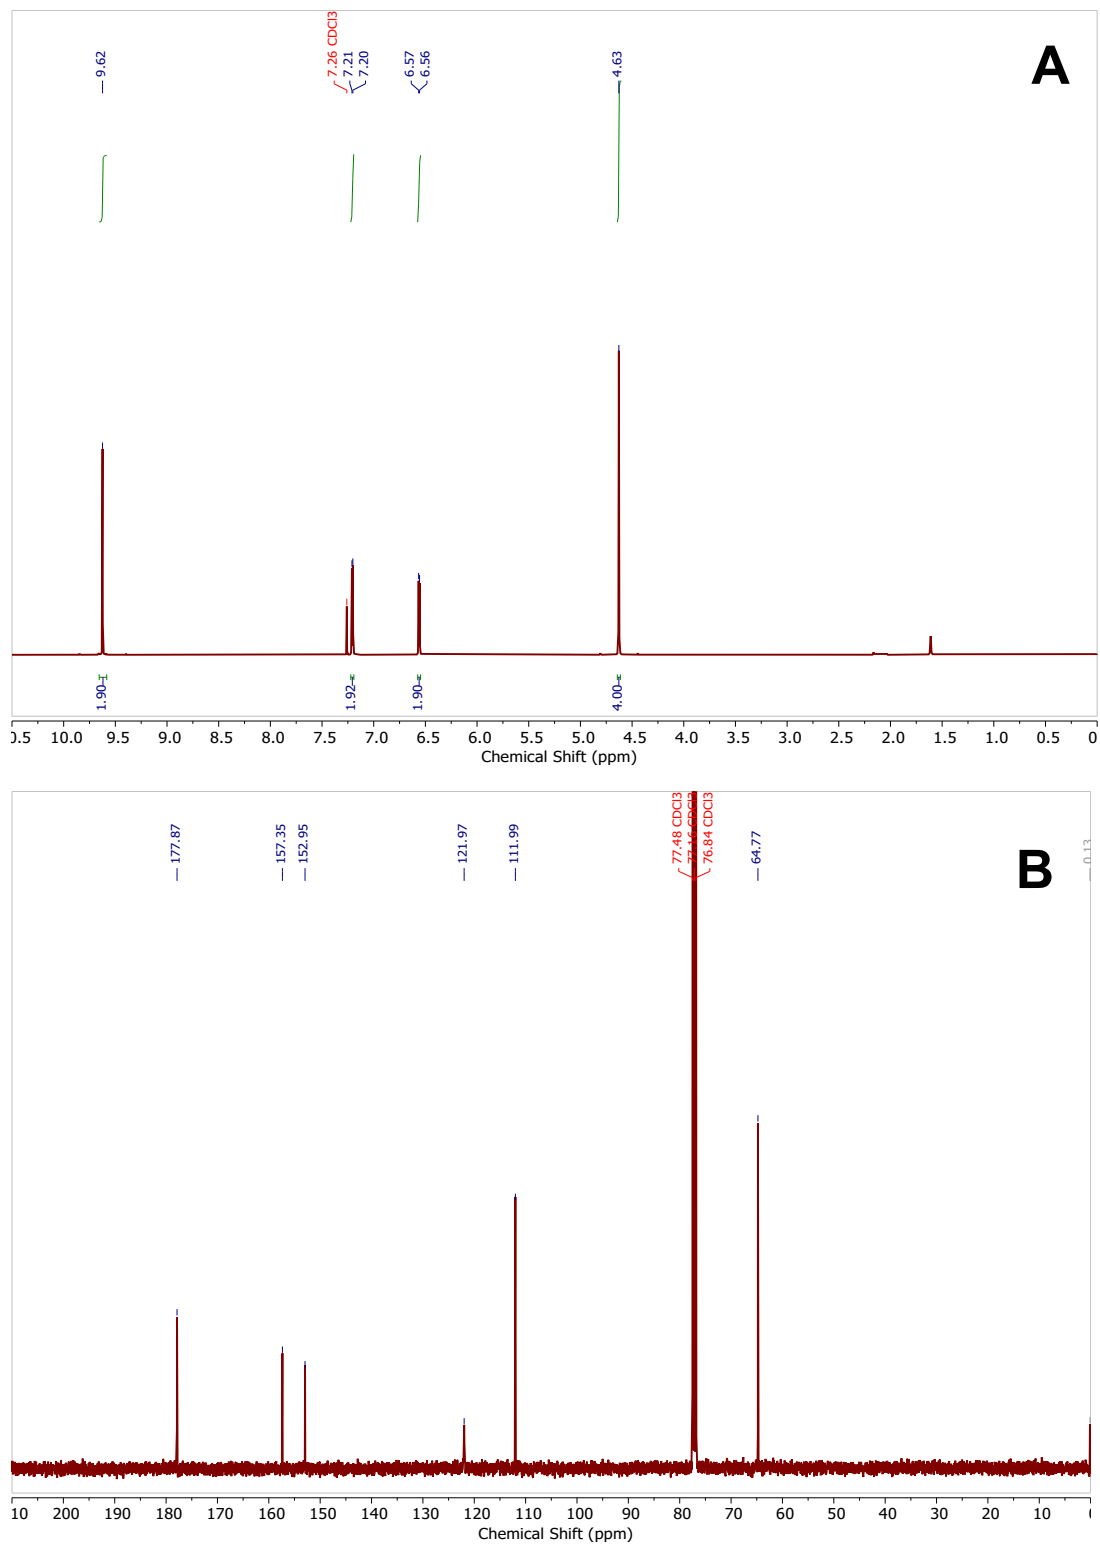

Figure S1.  $^1\text{H}$  NMR (A) and  $^{13}\text{C}$  NMR (B) spectra of OBMF recorded in  $\text{CDCl}_3$ .

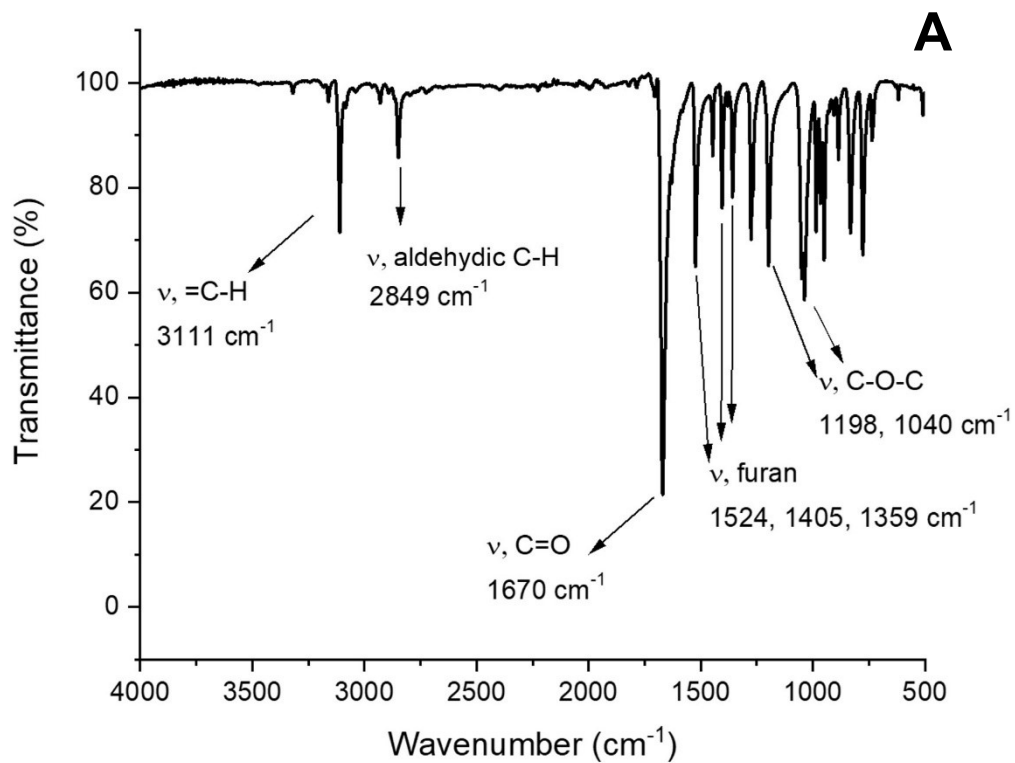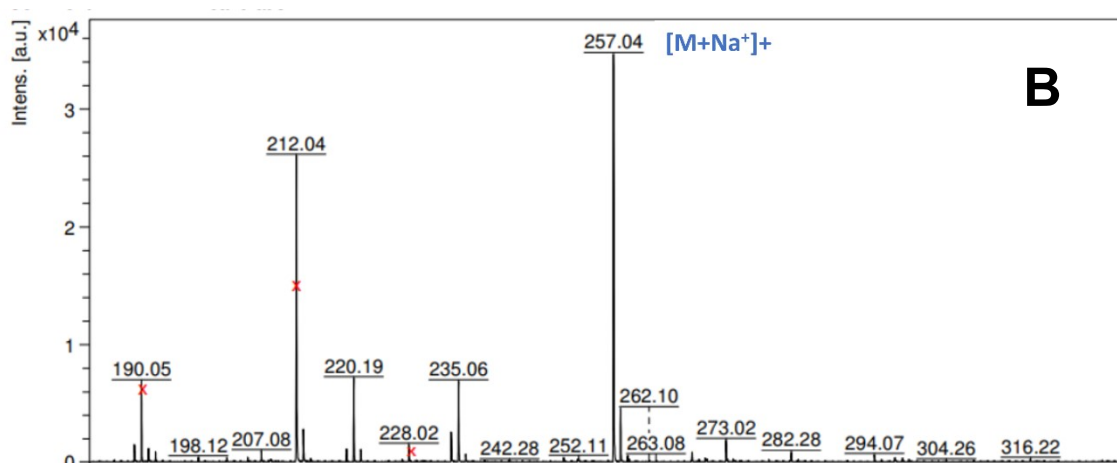

Figure S2. FTIR (A) and MALDI-TOF (B) spectra of OBMF.  $\alpha$ -Cyano-4-hydroxycinnamic acid (CHCA) was used as matrix in MALDI measurement. The peaks assigned with x corresponds to the matrix peaks.

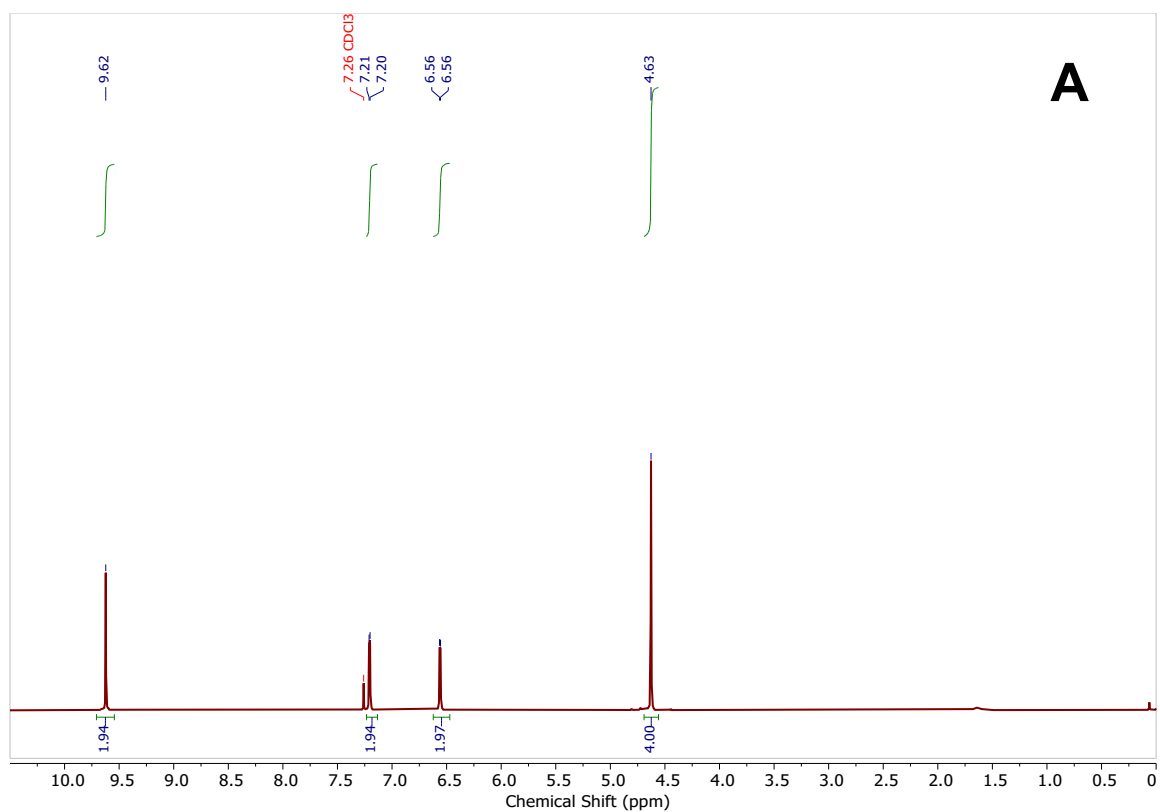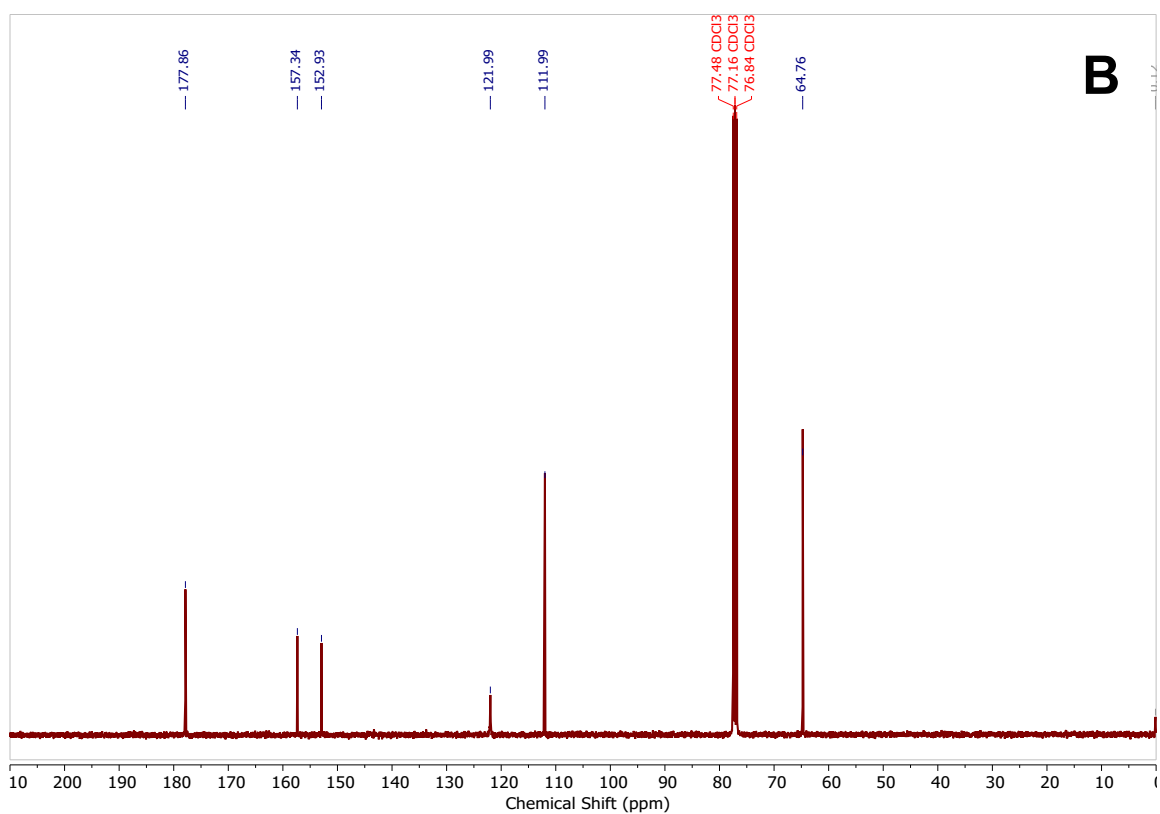

Figure S3. <sup>1</sup>H NMR (A) and <sup>13</sup>C NMR (B) spectra of OBMF recorded in CDCl<sub>3</sub>, after keeping the solids 1-year under ambient conditions.

Table S1. Isolated yields of OBMF at different concentrations of HMF.

|         | Concentration of HMF (mol/L) | Isolated Yield (%) |
|---------|------------------------------|--------------------|
| Entry 1 | 0.4                          | 64                 |
| Entry 2 | 0.2                          | 67                 |
| Entry 3 | 0.1                          | 79                 |

## 2. Synthesis and structural characterization of the polyimine networks

Table S2. Recipes for the preparation of polyimine networks.

|                | OBMF     | Diamine    | Triamine      |
|----------------|----------|------------|---------------|
| P(Flm)-TREN    | 6 mmol   | 0          | TREN 4 mmol   |
| CFRP(Flm)-TREN | 7.8 mmol | 0          | TREN 5.2 mmol |
| P(Flm)-PD      | 6 mmol   | PD 3 mmol  | TREN 2 mmol   |
| P(Flm)-MD      | 6 mmol   | MD 3 mmol  | TREN 2 mmol   |
| P(Flm)-FD      | 6 mmol   | FD 3 mmol  | TREN 2 mmol   |
| P(Flm)-Pri     | 6 mmol   | Pri 3 mmol | TREN 2 mmol   |

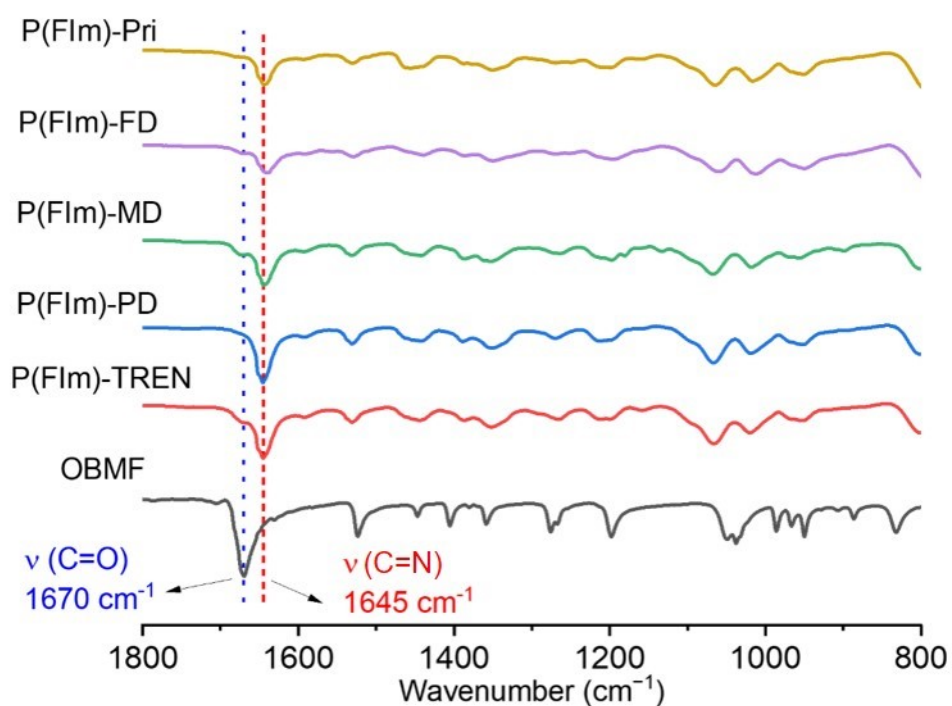

Figure S4. Characterization of the polyimine networks by FTIR.

### 3. Stability of polyimine networks in organic solvents and water

Table S3. Swelling measurements of **P(Fim)-TREN** in different solvents at room temperature.

| Solvents           | MeOH | EtOH | Acetone | IPA  | THF  | n-hexane | H <sub>2</sub> O |
|--------------------|------|------|---------|------|------|----------|------------------|
| Swelling ratio (%) | 82.6 | 49.2 | 16.2    | 0.8  | 22.5 | 0        | 37.6             |
| Gel content (%)    | 88.1 | 95.9 | 99.8    | 99.2 | 99.7 | 98.3     | 98.3             |

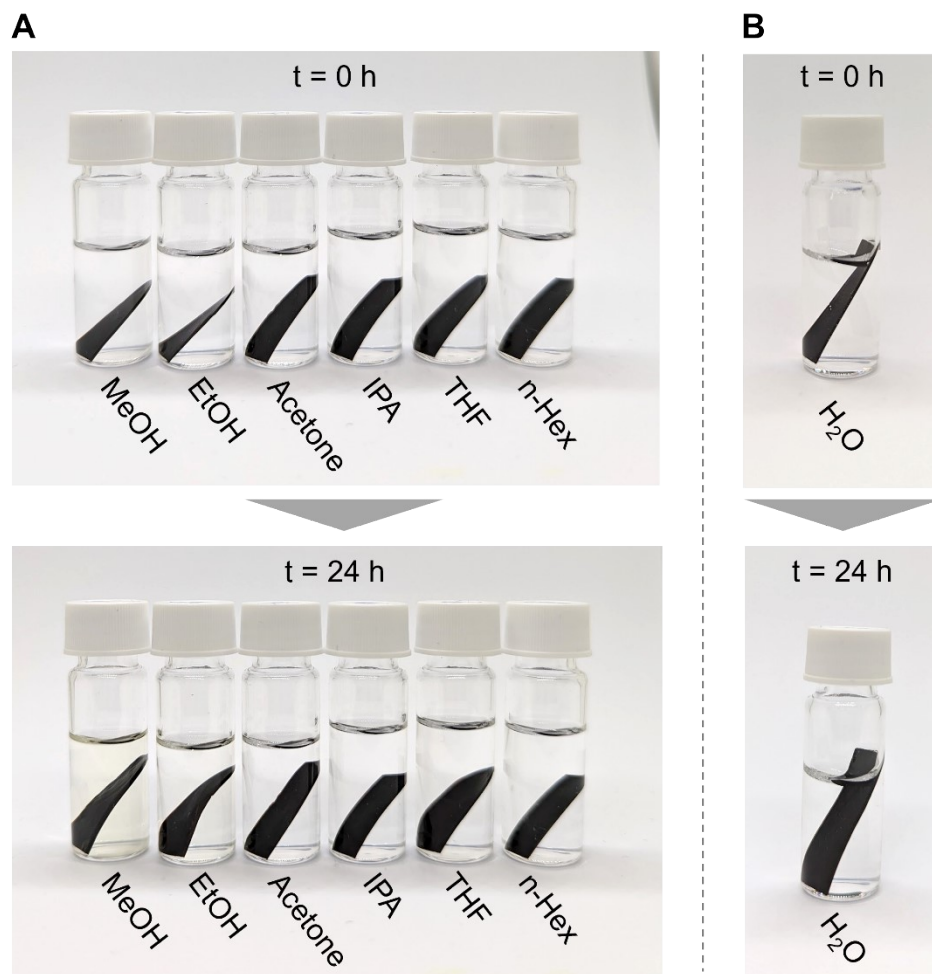

Figure S5. Photographs depicting the solvent resistance of **P(Fim)-TREN** in various organic solvents (A) and water (B) at different time intervals.

Table S4. Swelling measurements of **P(FIm)-FD** in different solvents at room temperature.

| Solvents           | MeOH | EtOH | Acetone | IPA  | THF  | n-hexane | H <sub>2</sub> O |
|--------------------|------|------|---------|------|------|----------|------------------|
| Swelling ratio (%) | 19.2 | 0.6  | 0.17    | 3.7  | 0.5  | 0.6      | 18.4             |
| Gel content (%)    | 95.2 | 99.6 | 99.3    | 99.4 | 99.8 | 99.6     | 97.3             |

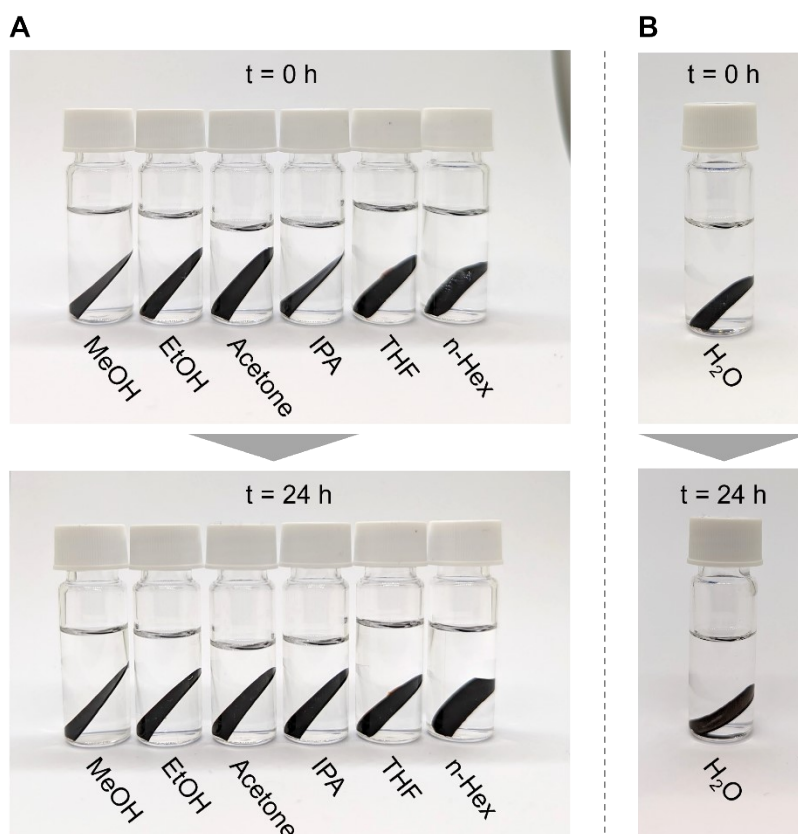

Figure S6. Photographs depicting the solvent resistance of **P(FIm)-FD** in various organic solvents (A) and water (B) at different time intervals.

#### 4. Thermal analysis of polyimine networks

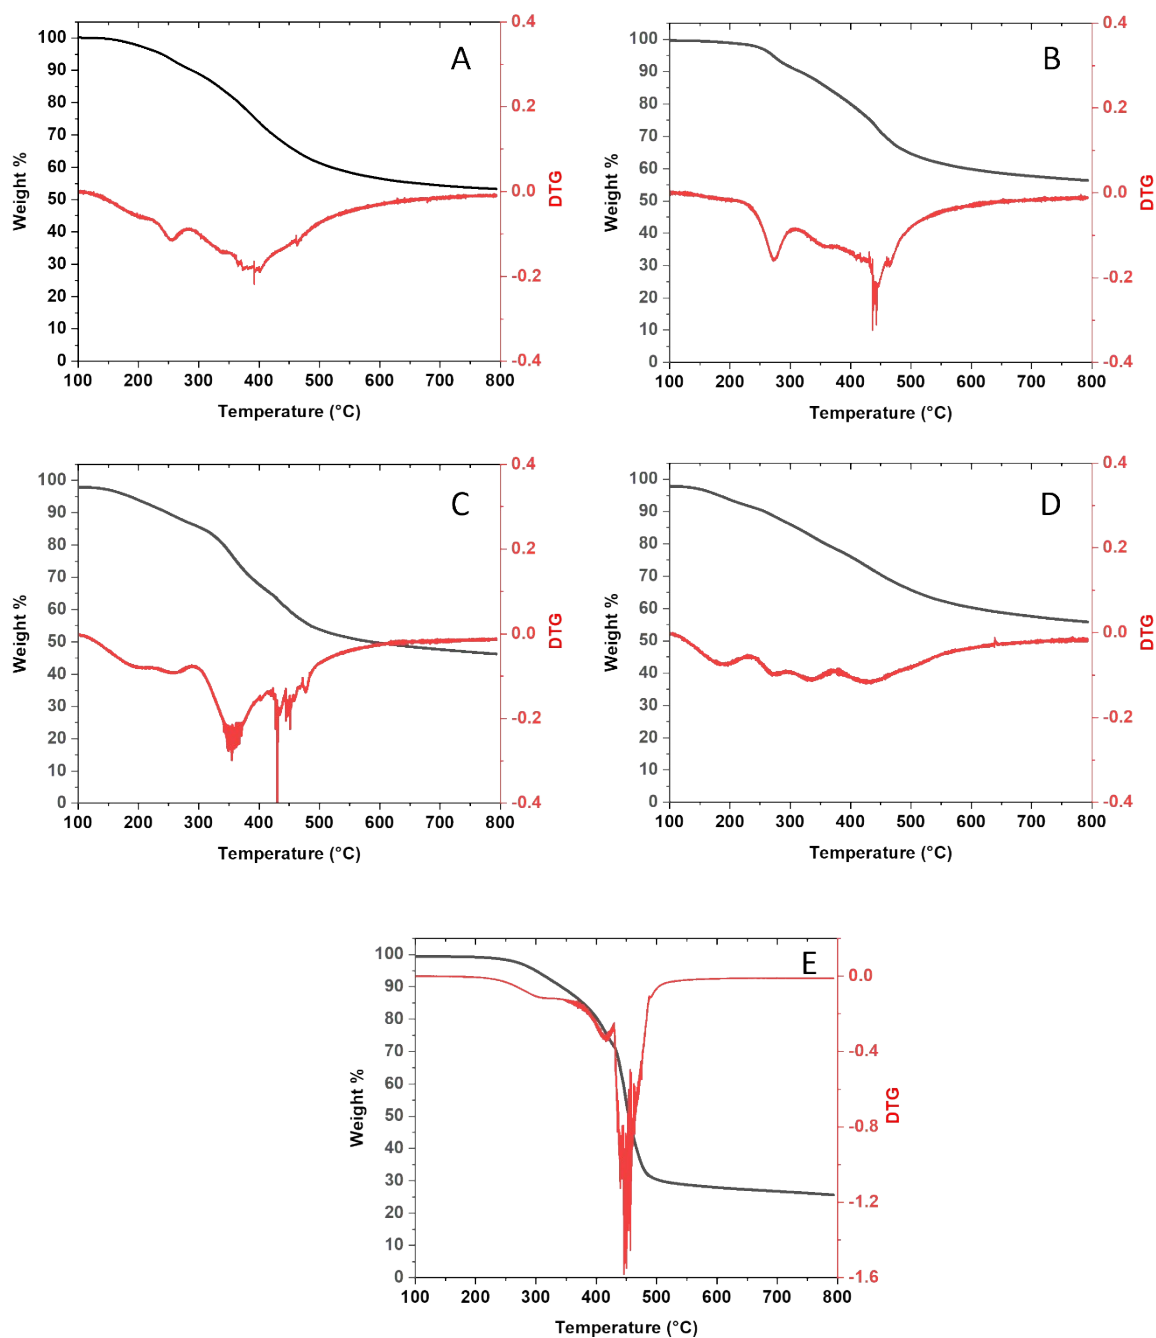

Figure S7. Thermogravimetric analysis (TGA) of the polyimines, performed under N<sub>2</sub>: **P(FIm)-TREN** (A), **P(FIm)-PD** (B), **P(FIm)-pMD** (C), **P(FIm)-FD** (D), **P(FIm)-Pri** (E).



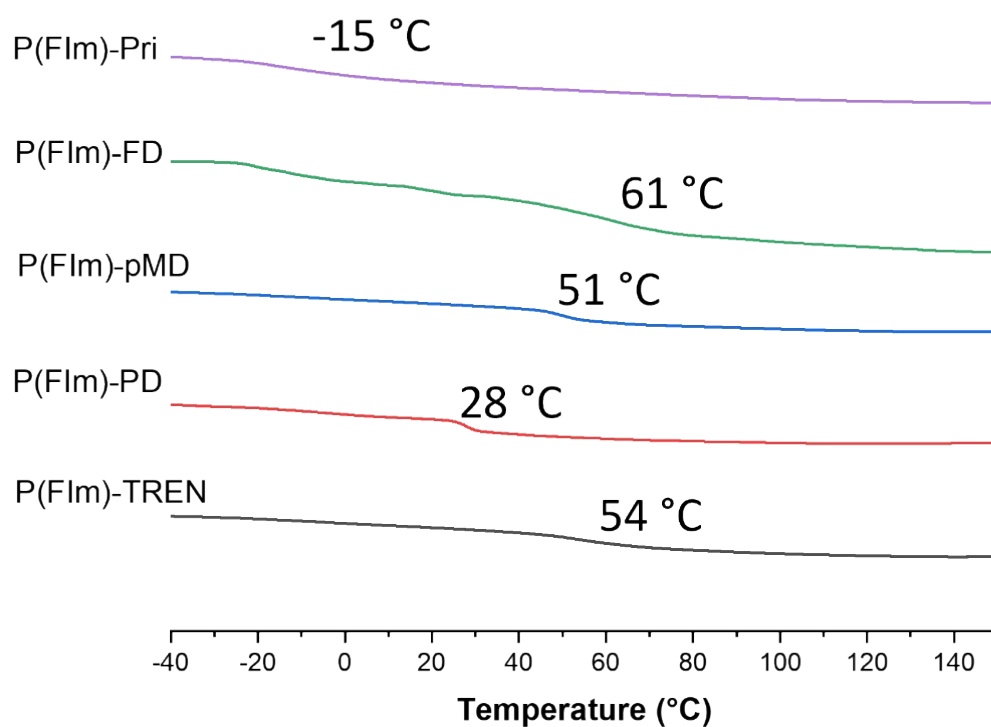

Figure S8. Differential scanning calorimetry (DSC) of the polyimines, performed under N<sub>2</sub>. The heating rate of P(Flm)-FD and P(Flm)-TREN was 20 °C/min, whereas that of the others was 10 °C/min.

## 5. Thermomechanical analysis of polyimine networks

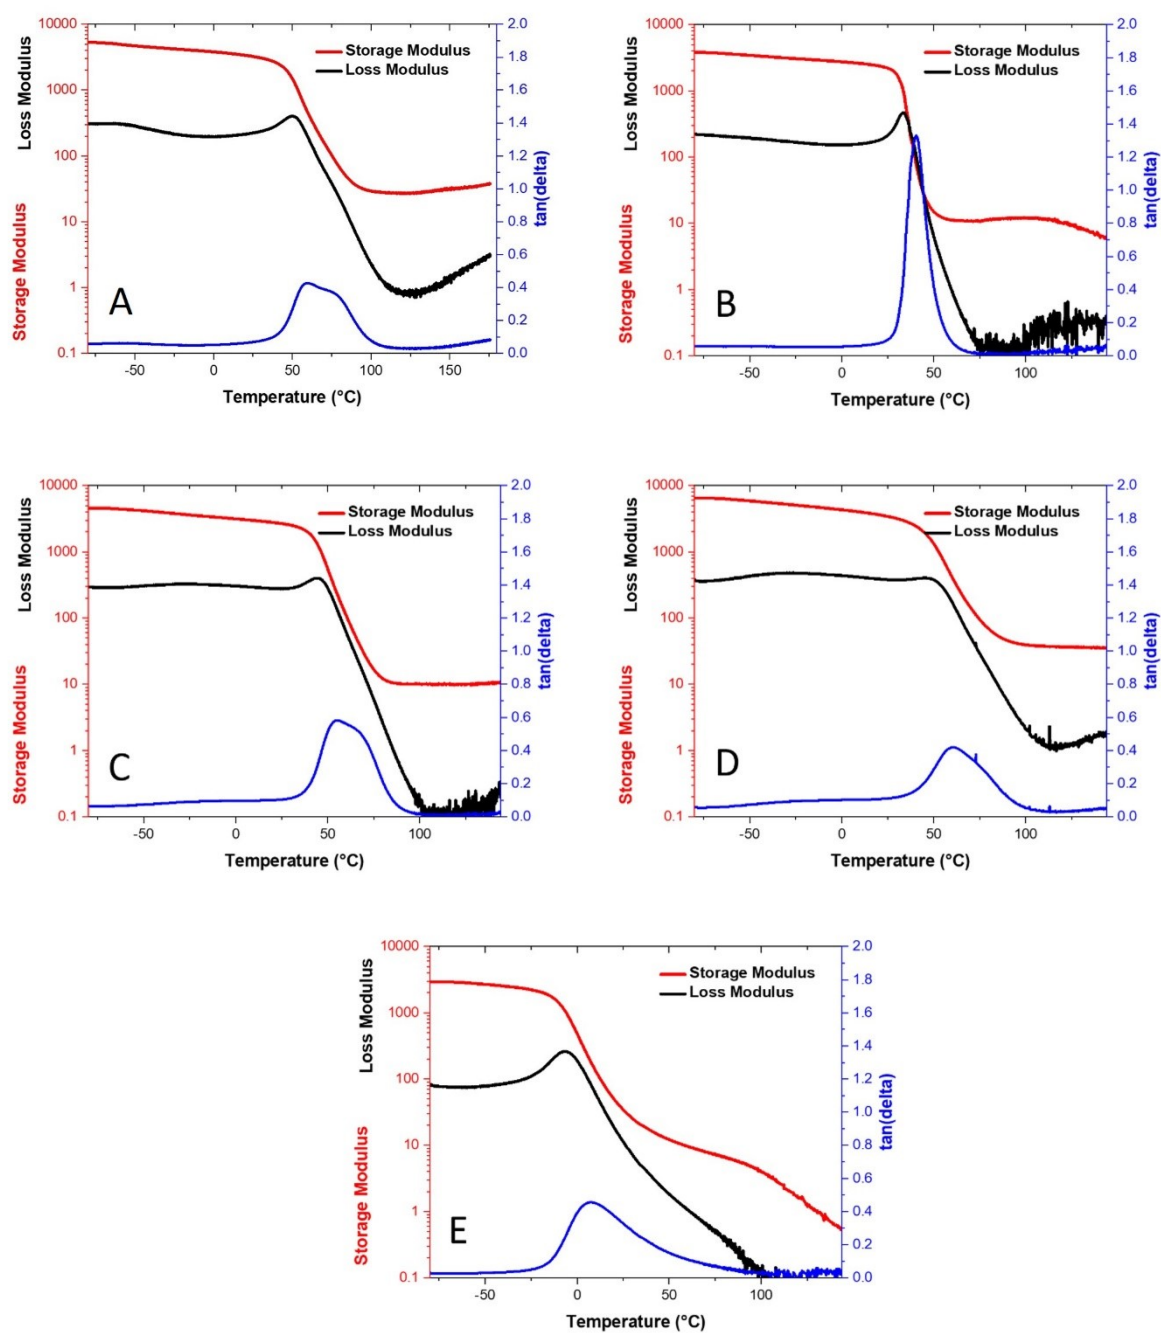

Figure S9. Dynamic mechanical analysis (DMA) of the polyimines: **P(FIm)-TREN** (A), **P(FIm)-PD** (B), **P(FIm)-pMD** (C), **P(FIm)-FD** (D), **P(FIm)-Pri** (E).

## 6. Mechanical analysis

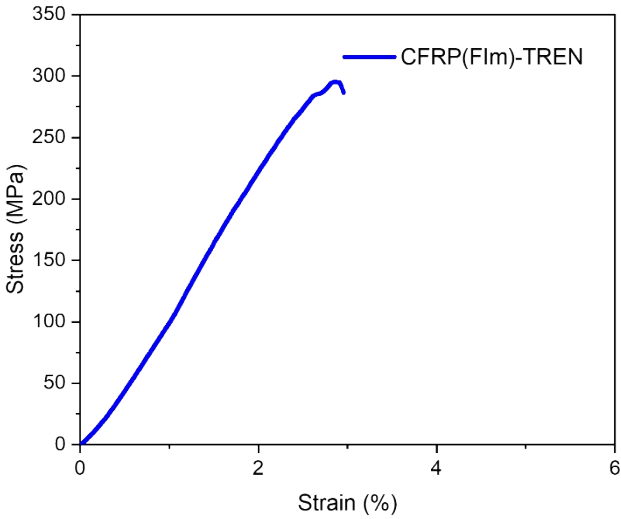

|                       | Maximum stress (MPa) | Strain at break (%) | Young's modulus (GPa) |
|-----------------------|----------------------|---------------------|-----------------------|
| <b>CFRP(FIm)-TREN</b> | 295.1 ± 46.5         | 3.0 ± 0.8           | 10.7 ± 0.9            |

Figure S10. Tensile stress-strain curve of the polyimine based carbon-fiber composite, **CFRP(FIm)-TREN**.

## 7. Scanning electron microscopy

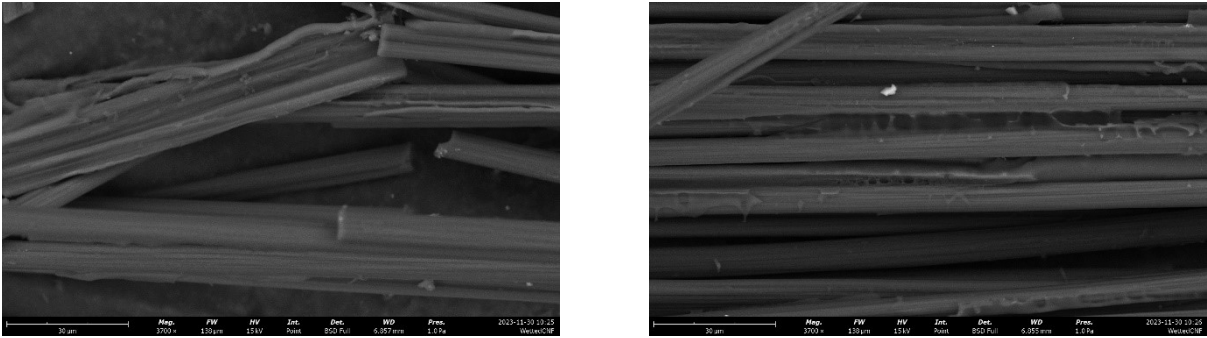

Figure S11. Investigation of the fractured **CFRP(FIm)-TREN** composite by scanning electron microscopy. Scale bar is 30 µm.

## 8. Chemical recycling of the P(FIm)-TREN network

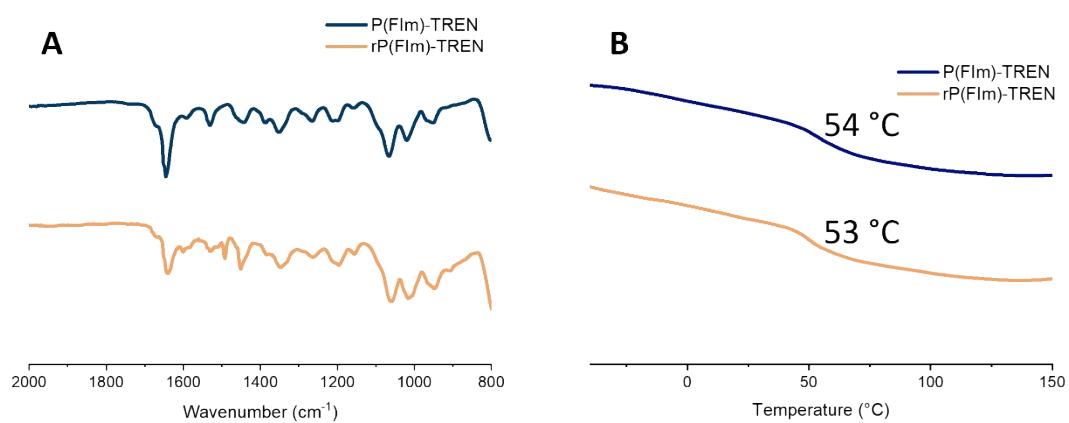

Figure S12. Comparison of the virgin **P(FIm)-TREN** and recycled **rP(FIm)-TREN**: FTIR (A), DSC (B).
